# Supplementary material for: Noncontrast Computed Tomography vs Computed Tomography Perfusion or Magnetic Resonance Imaging Selection in Late Presentation of Stroke With Large-Vessel Occlusion
Source: PubMed Central journal article supplement — JAMA Neurol. 2021 Nov 8;79(1):1–10. doi: 10.1001/jamaneurol.2021.4082 (PMC8576630; doi:10.1001/jamaneurol.2021.4082), 2021-11-08
Supplement: jamaneurol-e214082-s001.pdf [file jamaneurol-e214082-s001.pdf]

## Supplemental Online Content

Nguyen TN, Abdalkader M, Nagel S, et al. Noncontrast computed tomography vs computed tomography perfusion or magnetic resonance imaging selection in late presentation of large-vessel occlusion stroke. *JAMA Neurol*. Published online November 8, 2021. doi:10.1001/jamaneurol.2021.4082

**eTable 1.** Neuroimaging triage protocols of sites in the CLEAR Study

**eTable 2.** Selection criteria for late window (6-24h) thrombectomy between 2014 to 2020

**eTable 3.** Modified Rankin Score Assessment

**eTable 4.** Analysis of imaging modality with good outcome: Local patients

**eTable 5.** mTICI reperfusion and 90-day mRS by imaging modality

This supplemental material has been provided by the authors to give readers additional information about their work.

**eTable 1. Neuroimaging triage protocols of sites in the CLEAR Study**

| Site                           | CT ASPECTS             | CTA routine                               | CTA Collateral for selection | CT selection beyond ASPECTS      | CT vs advanced imaging                | CTP criteria                        | MRI                                                      |
|--------------------------------|------------------------|-------------------------------------------|------------------------------|----------------------------------|---------------------------------------|-------------------------------------|----------------------------------------------------------|
| Bern                           | Not used               | Yes                                       | No                           | No                               | Advanced imaging routine              | Tmax>6, rCBF<35%, ADC<620*          | Same as CTP                                              |
| Boston Medical Center          | ≥5                     | Yes                                       | No                           | No                               | Advanced imaging rarely used          | Rarely used                         | Rarely used                                              |
| CHU Lille                      | No specified threshold | If contraindication to MRI                | No                           | No                               | MRI Routine                           | No                                  | Core <70 ml, Mismatch ratio 1.8, Mismatch volume > 15 ml |
| CHU Montreal                   | ≥5                     | Yes                                       | No                           | No                               | Advanced imaging rarely used          | Rarely used, no guideline           | Rarely used, no guideline                                |
| Cooper                         | No specified threshold | Yes                                       | Sometimes                    | No                               | Attending dependent                   | No specified threshold; most <50 ml | No                                                       |
| Grady Memorial                 | No specified threshold | Yes                                       | No                           | No                               | Advanced imaging (CTP) routine        | No specified threshold              | N/A                                                      |
| Heidelberg University Hospital | ≥6                     | Yes                                       | No                           | No                               | Attending dependent**                 | Core < 100 ml                       | Core < 100 ml                                            |
| Lausanne University Hospital   | ≥7 (NIHSS≥10)          | Yes, until May 2018 (MRI initial imaging) | No                           | Core < 2/3 of affected territory | NCCT if contraindications to advanced | Core < 50 ml (NIHSS≥10); core       | Same as CTP                                              |

|                             |                            |     |     |                                     |                                                                                                               |                                             |                             |
|-----------------------------|----------------------------|-----|-----|-------------------------------------|---------------------------------------------------------------------------------------------------------------|---------------------------------------------|-----------------------------|
|                             | $\geq 8$<br>(NIHSS<br><10) |     |     |                                     | imaging or technical problems with CTP (movement artifact, injection failure, poor cardiac ejection fraction) | < 30 ml<br>(NIHSS<br><10)                   |                             |
| Mercy Hospital              | $\geq 6$                   | Yes | No  | Yes, greater than 1/3 MCA territory | Availability of the lab                                                                                       | >1.2 mismatch ratio                         | No                          |
| SUNY Upstate Medical        | $\geq 6$                   | Yes | Yes | No                                  | CT only if clinical-imaging mismatch                                                                          | Core < 70 ml                                | Core < 70 ml                |
| University of Iowa          | $\geq 6$                   | Yes | No  | No                                  | Advanced imaging only                                                                                         | Core < 70 ml                                | No                          |
| University of Massachusetts | $\geq 6$                   | Yes | Yes | No                                  | CT only if clinical-imaging mismatch                                                                          | Core < 70 ml                                | No                          |
| UT Health McGovern          | $\geq 6$                   | Yes | No  | No                                  | CTP Routine                                                                                                   | Core < 70 ml, significant mismatch          | Rarely used                 |
| University of Toledo        | $\geq 6$                   | Yes | Yes | No                                  | CT only if ASPECTS 9 or 10                                                                                    | No pre-specified parameters                 | No pre-specified parameters |
| Vall D'Hebron, Barcelona    | No specific threshold      | Yes | No  | No                                  | CTP if NCCT not favorable                                                                                     | Routine; CTP volumes not used for selection | Rarely used                 |

|  |  |  |  |  |  |                   |  |
|--|--|--|--|--|--|-------------------|--|
|  |  |  |  |  |  | if NCCT favorable |  |
|--|--|--|--|--|--|-------------------|--|

CHU: Centre Hospitalier de l'Université; ASPECTS: Alberta Early CT Program CT Score.

\* Olea, Rapid and Syngo were used for perfusion processing. No thresholds for volumes were used.

\*\* Refer to Nagel S, Herweh C, et al. JNIS supplement for additional details of their imaging selection protocol.

**eTable 2. Selection criteria for late window (6-24h) thrombectomy between 2014 to 2020**

| Site                           | Change in patient selection for mechanical thrombectomy between 2014 to 2020                                                                                                                                                                                                                                                                                                                                                                                                                                                                                                                                                                                                                                                                                                                                                                                                                                                                                              |
|--------------------------------|---------------------------------------------------------------------------------------------------------------------------------------------------------------------------------------------------------------------------------------------------------------------------------------------------------------------------------------------------------------------------------------------------------------------------------------------------------------------------------------------------------------------------------------------------------------------------------------------------------------------------------------------------------------------------------------------------------------------------------------------------------------------------------------------------------------------------------------------------------------------------------------------------------------------------------------------------------------------------|
| Bern                           | No change, other than more distal occlusions being treated over time                                                                                                                                                                                                                                                                                                                                                                                                                                                                                                                                                                                                                                                                                                                                                                                                                                                                                                      |
| Boston Medical Center          | Selected more patients in extended window after 2018                                                                                                                                                                                                                                                                                                                                                                                                                                                                                                                                                                                                                                                                                                                                                                                                                                                                                                                      |
| CHU Lille                      | Selected more patients in extended window after 2018                                                                                                                                                                                                                                                                                                                                                                                                                                                                                                                                                                                                                                                                                                                                                                                                                                                                                                                      |
| CHU Montreal                   | No change                                                                                                                                                                                                                                                                                                                                                                                                                                                                                                                                                                                                                                                                                                                                                                                                                                                                                                                                                                 |
| Cooper                         | Selected more patients in extended window after 2018; no change in imaging protocol before and after 2018                                                                                                                                                                                                                                                                                                                                                                                                                                                                                                                                                                                                                                                                                                                                                                                                                                                                 |
| Grady Memorial Hospital        | No change                                                                                                                                                                                                                                                                                                                                                                                                                                                                                                                                                                                                                                                                                                                                                                                                                                                                                                                                                                 |
| Heidelberg University Hospital | No change**                                                                                                                                                                                                                                                                                                                                                                                                                                                                                                                                                                                                                                                                                                                                                                                                                                                                                                                                                               |
| Lausanne University Hospital   | <p>Until 2014, EVT if treatment initiated within 6 hours, NIHSS <math>\geq 6</math>, CTA proximal LVO, and CTP showed <math>&gt; 50\%</math> penumbra and informed consent was available.</p> <p>Since October 2014, CTP criteria were replaced by ASPECTS <math>\geq 5</math> and lower NIHSS limit replaced by the presence of disabling deficit.</p> <p>Since May 2017, patients were treated with the same criteria up to 8 hours. After 8 hours, treatment was offered with modified DAWN criteria: i.e. in the presence of NIHSS <math>\geq 10</math> and ASPECTS <math>\geq 7</math>, or if stroke was disabling, NIHSS was 1-10, and ASPECTS was <math>\geq 8</math>.</p> <p>Since January 2018, late treatment was alternatively based on any NIHSS, core <math>&lt; 70</math> ml and mismatch ratio ((penumbra + core)/core) <math>&gt; 1.8</math>, according to DEFUSE-3 criteria, and in accordance with European and American guideline recommendations.</p> |
| Mercy Hospital, Toledo         | No change                                                                                                                                                                                                                                                                                                                                                                                                                                                                                                                                                                                                                                                                                                                                                                                                                                                                                                                                                                 |

|                                 |                                                                                                                                                                                            |
|---------------------------------|--------------------------------------------------------------------------------------------------------------------------------------------------------------------------------------------|
| SUNY Upstate Medical University | After 2018, selection criteria resembled DAWN/DEFUSE-3 trial protocols                                                                                                                     |
| University of Iowa              | After 2015, selection with RAPID software. EVT in extended window not widely implemented until after 2018                                                                                  |
| University of Massachusetts     | No change                                                                                                                                                                                  |
| UT Health McGovern              | After 2018, CTP criteria were added to the stroke imaging selection protocol for extended window patients similar to DEFUSE-3, anterior circulation patients with NIHSS $\geq$ 6, mRS 0-2. |
| University of Toledo            | No change                                                                                                                                                                                  |
| Vall D'Hebron, Barcelona        | After 2018, indications for EVT expanded in the extended window                                                                                                                            |

CHU: Centre Hospitalier de l'Université; EVT: endovascular therapy

\*\* Refer to Nagel S, Herweh C, et al. JNIS supplement for additional details of their imaging selection protocol.

**eTable3. Modified Rankin Score Assessment**

| <b>Site</b>                     | <b>Modified Rankin Score assessment by site</b>                                                                                           | <b>mRS blinding to mode of imaging selection</b>                            |
|---------------------------------|-------------------------------------------------------------------------------------------------------------------------------------------|-----------------------------------------------------------------------------|
| Bern                            | Standard phone interview by study nurse                                                                                                   | Unblinded                                                                   |
| Boston Medical Center           | Standard questionnaire used by clinician (in clinic or telehealth) or stroke quality coordinator (via telephone).                         | Provider could have been aware of the imaging modality used                 |
| CHU Lille                       | Standard questionnaire by trained neurologists                                                                                            | Unblinded                                                                   |
| CHU Montreal                    | Standard approach by neurologists (trained by NINDS criteria)                                                                             | Unblinded                                                                   |
| Cooper University               | Half of mRS obtained by neurology provider (MD, NP) during follow-up visit; half of mRS obtained with semi-structured telephone interview | Provider could have been aware of imaging modality of selection             |
| Grady Memorial Hospital         | Standard approach. If phone, used Bruno et al. questionnaire. *                                                                           | Provider could have been aware of imaging modality of selection             |
| Lausanne University Hospital    | Standard approach at outpatient clinic or standard telephone interview, all with mRS-certified medical personnel                          | Blind to patient treatment in the acute phase                               |
| Mercy Hospital, Toledo          | Standard approach by certified stroke unit nurse, conducted follow-up call                                                                | Not aware of imaging modality for treatment                                 |
| University of Iowa              | Standard approach                                                                                                                         | Unblinded                                                                   |
| University of Massachusetts     | Neurologist, stroke coordinator and dedicated conducted mRS with standard approach                                                        | The assessors were not aware of the mode of patient selection for treatment |
| UT Health McGovern              | mRS was determined by a standard questionnaire, performed by certified stroke coordinators who conducted phone-based surveys              | Provider could have been aware of imaging modality of selection             |
| University of Toledo            | mRS was conducted with a standard approach, conducted by stroke nurse                                                                     | Provider could have been aware of imaging modality of selection             |
| SUNY Upstate Medical University | mRS was conducted with a standard approach, conducted by stroke attending and NP in clinic                                                | Provider could have been aware of imaging modality of selection             |

|                             |                                             |           |
|-----------------------------|---------------------------------------------|-----------|
| Vall D'Hebron,<br>Barcelona | mRS was performed by the treating physician | Unblinded |
|-----------------------------|---------------------------------------------|-----------|

\*Reference: Bruno A, Akinwuntan AE, Lin C, Close B, Davis K, Baute V, Aryal T, Brooks D, Hess DC, Switzer JA, Nichols FT. Simplified modified rankin scale questionnaire: reproducibility over the telephone and validation with quality of life. Stroke. 2011 Aug;42(8):2276-9.



| <b>eTable 4. Univariate and multivariate analysis of imaging modality with good outcome (mRS score 0–2) and ordinal mRS shift: Local patients</b> |                               |       |                  |       |
|---------------------------------------------------------------------------------------------------------------------------------------------------|-------------------------------|-------|------------------|-------|
|                                                                                                                                                   | Univariate                    |       | Multivariate     |       |
|                                                                                                                                                   | Odds ratio (95% CI), <i>P</i> |       |                  |       |
| Outcome mRS 0-2                                                                                                                                   |                               |       |                  |       |
| CT                                                                                                                                                | Ref                           |       | Ref              |       |
| CTP                                                                                                                                               | 0.86 (0.56-1.30)              | 0.461 | 0.71 (0.42-1.21) | 0.209 |
| MRI                                                                                                                                               | 0.75 (0.37-1.51)              | 0.416 | 0.69 (0.36-1.33) | 0.272 |
| Outcome mRS shift                                                                                                                                 |                               |       |                  |       |
| CT                                                                                                                                                | Ref                           |       |                  |       |
| CTP                                                                                                                                               | 0.92 (0.65-1.31)              | 0.652 | 0.74 (0.46-1.18) | 0.205 |
| MRI                                                                                                                                               | 0.84 (0.53-1.35)              | 0.481 | 0.78 (0.54-1.12) | 0.175 |

| <b>eTable 5. mTICI Reperfusion and mRS at 90 days.</b>          |                            |                            |          |
|-----------------------------------------------------------------|----------------------------|----------------------------|----------|
|                                                                 | mRS 90 days 0-2<br>(n=676) | mRS 90 days 3-6<br>(n=923) | <i>P</i> |
| Reperfusion mTICI                                               |                            |                            |          |
|                                                                 | n (row %)                  |                            |          |
| 0-2a                                                            | 25 (12.2)                  | 180 (87.8)                 | <0.0001  |
| 2b-3                                                            | 651 (46.7)                 | 743 (53.3)                 |          |
| Odds of good outcome (mRS score 0-2) for mTICI reperfusion 2b-3 |                            |                            |          |
|                                                                 | Odds ratio (95% CI)        |                            |          |
| Overall                                                         | 6.3 (4.4-8.9)              |                            | <0.0001  |
| CT                                                              | 6.1 (2.2-16.5)             |                            | 0.0004   |
| CTP                                                             | 5.1 (2.9-9.2)              |                            | <0.0001  |
| MRI                                                             | 8.9 (6.7-11.9)             |                            | <0.0001  |

TICI: thrombolysis in cerebral infarction
